# Supplementary material for: Universal Free School Meals and School and Student Outcomes: A Systematic Review
Source: PubMed Central journal article supplement (PMC11316229; doi:10.1001/jamanetworkopen.2024.24082), 2024-08-09
Supplement: jamanetwopen-e2424082-s002.pdf [file jamanetwopen-e2424082-s002.pdf]

## Data Sharing Statement

Spill. Universal Free School Meals and School and Student Outcomes. *JAMA Netw Open*.  
Published August 01, 2024. doi:10.1001/jamanetworkopen.2024.24082

### Data

**Data available:** Yes

**Data types:** Other (please specify)

**Additional Information:** All included and excluded studies, search strategy will be made available.

**How to access data:** Excluded studies excluded at the level of full text screening are included in the supplement. Studies excluded at title and abstract screening will be made available by contacting the authors.

**When available:** With publication

### Supporting Documents

**Document types:** None

### Additional Information

**Who can access the data:** Anyone requesting the data.

**Types of analyses:** For any purpose

**Mechanisms of data availability:** With investigator support
